# Supplementary material for: Neuroretinal Biomarkers for Schizophrenia Spectrum Disorders
Source: PubMed Central journal article supplement — Transl Vis Sci Technol. 2021 Apr 27;10(4):29. doi: 10.1167/tvst.10.4.29 (PMC8083086; doi:10.1167/tvst.10.4.29), 2021-04-27
Supplement: tvst-10-4-29_s001.pdf [file tvst-10-4-29_s001.pdf]

| <b>Peripapillary RNFL</b> | Control      | SSD          | P-value      |
|---------------------------|--------------|--------------|--------------|
| S                         | 119.4 ± 14.5 | 115.0 ± 15.1 | 0.234        |
| N                         | 71.6 ± 12.6  | 74.1 ± 12.1  | 0.307        |
| I                         | 129.7 ± 19.1 | 117.6 ± 17.1 | <b>0.009</b> |
| T                         | 65.8 ± 9.3   | 60.6 ± 11.1  | <b>0.010</b> |
| Average                   | 96.6 ± 10.4  | 91.8 ± 9.3   | <b>0.049</b> |

| <b>Macular RNFL</b> | Control    | SSD        | P-value |
|---------------------|------------|------------|---------|
| S                   | 35.1 ± 3.2 | 35.0 ± 4.2 | 0.681   |
| SN                  | 36.7 ± 3.8 | 37.4 ± 4.9 | 0.738   |
| ST                  | 23.3 ± 2.3 | 22.7 ± 2.2 | 0.120   |
| I                   | 35.9 ± 3.0 | 35.7 ± 4.2 | 0.341   |
| IN                  | 38.1 ± 3.7 | 37.9 ± 5.1 | 0.463   |
| IT                  | 24.3 ± 2.1 | 24.1 ± 2.4 | 0.308   |
| Average             | 32.2 ± 2.3 | 32.2 ± 3.3 | 0.616   |

| <b>GC-IPL</b> | Control    | SSD        | P-value |
|---------------|------------|------------|---------|
| S             | 83.3 ± 6.8 | 81.8 ± 6.4 | 0.158   |
| SN            | 84.6 ± 6.4 | 83.2 ± 6.3 | 0.153   |
| ST            | 81.4 ± 5.9 | 80.3 ± 5.8 | 0.123   |
| I             | 80.4 ± 6.7 | 78.6 ± 8.2 | 0.176   |
| IN            | 82.5 ± 6.4 | 80.7 ± 8.0 | 0.169   |
| IT            | 82.0 ± 7.4 | 80.7 ± 8.1 | 0.199   |
| Average       | 82.4 ± 6.2 | 80.9 ± 6.6 | 0.130   |

| <b>Photoreceptor Complex</b> | Control      | SSD         | P-value |
|------------------------------|--------------|-------------|---------|
| S                            | 129.7 ± 9.7  | 127.9 ± 8.8 | 0.470   |
| SN                           | 123.5 ± 11.5 | 123.8 ± 9.9 | 0.708   |
| ST                           | 126.4 ± 8.7  | 124.4 ± 8.7 | 0.308   |
| I                            | 121.2 ± 9.6  | 119.6 ± 8.5 | 0.348   |
| IN                           | 121.2 ± 10.9 | 119.2 ± 9.0 | 0.377   |
| IT                           | 124.1 ± 8.7  | 121.7 ± 8.4 | 0.193   |
| Average                      | 124.4 ± 8.9  | 122.8 ± 7.8 | 0.413   |

| <b>Total Macula</b> | Control      | SSD          | P-value |
|---------------------|--------------|--------------|---------|
| Center              | 246.6 ± 18.9 | 254.2 ± 26.6 | 0.469   |
| IR                  | 313.6 ± 17.5 | 313.5 ± 18.4 | 0.610   |
| IS                  | 320.4 ± 16.8 | 319.0 ± 16.7 | 0.429   |
| IL                  | 315.2 ± 17.2 | 313.9 ± 18.8 | 0.371   |
| II                  | 316.2 ± 15.6 | 314.0 ± 17.6 | 0.254   |
| OR                  | 276.2 ± 22.4 | 276.0 ± 21.0 | 0.706   |

|    |              |              |       |
|----|--------------|--------------|-------|
| OS | 276.5 ± 16.2 | 274.6 ± 12.1 | 0.533 |
| OL | 278.8 ± 23.3 | 276.8 ± 22.5 | 0.495 |
| OI | 263.4 ± 13.3 | 263.1 ± 12.3 | 0.725 |

**Supplementary Table 1:** S=superior; N=nasal; I=inferior; T=temporal; SN=superior-nasal; ST=superior-temporal; IN=inferior-nasal; IT=inferior-temporal; IR=inner-right; IS=inner-superior; IL=inner-left; II=inner-inferior; OR=outer-right; OS=outer-superior; OL=outer-left; OI=outer-inferior. Values  $p < 0.05$  are in bold.
