# Supplementary material for: Neuroretinal Biomarkers for Schizophrenia Spectrum Disorders
Source: PubMed Central journal article supplement — Transl Vis Sci Technol. 2021 Apr 27;10(4):29. doi: 10.1167/tvst.10.4.29 (PMC8083086; doi:10.1167/tvst.10.4.29), 2021-04-27
Supplement: tvst-10-4-29_s002.pdf [file tvst-10-4-29_s002.pdf]

| <b>Cutoff</b> | <b>Sensitivity</b> | <b>1 - Specificity</b> |
|---------------|--------------------|------------------------|
| 0.00          | 1.00               | 1.00                   |
| 0.06          | 1.00               | 0.99                   |
| 0.10          | 1.00               | 0.97                   |
| 0.12          | 1.00               | 0.95                   |
| 0.16          | 1.00               | 0.94                   |
| 0.19          | 1.00               | 0.92                   |
| 0.21          | 0.99               | 0.92                   |
| 0.22          | 0.99               | 0.91                   |
| 0.23          | 0.98               | 0.91                   |
| 0.23          | 0.98               | 0.89                   |
| 0.26          | 0.98               | 0.88                   |
| 0.27          | 0.98               | 0.86                   |
| 0.28          | 0.98               | 0.85                   |
| 0.30          | 0.98               | 0.83                   |
| 0.31          | 0.98               | 0.82                   |
| 0.33          | 0.98               | 0.80                   |
| 0.34          | 0.97               | 0.80                   |
| 0.35          | 0.97               | 0.80                   |
| 0.35          | 0.96               | 0.80                   |
| 0.36          | 0.95               | 0.80                   |
| 0.36          | 0.94               | 0.80                   |
| 0.36          | 0.94               | 0.79                   |
| 0.38          | 0.94               | 0.77                   |
| 0.39          | 0.94               | 0.75                   |
| 0.39          | 0.94               | 0.74                   |
| 0.40          | 0.93               | 0.74                   |
| 0.41          | 0.93               | 0.72                   |
| 0.41          | 0.93               | 0.71                   |
| 0.41          | 0.93               | 0.69                   |
| 0.41          | 0.93               | 0.68                   |
| 0.42          | 0.93               | 0.66                   |
| 0.42          | 0.93               | 0.65                   |
| 0.42          | 0.93               | 0.63                   |
| 0.43          | 0.93               | 0.62                   |
| 0.43          | 0.93               | 0.60                   |
| 0.43          | 0.92               | 0.60                   |
| 0.43          | 0.91               | 0.60                   |

|      |      |      |
|------|------|------|
| 0.44 | 0.90 | 0.60 |
| 0.44 | 0.89 | 0.60 |
| 0.45 | 0.89 | 0.60 |
| 0.47 | 0.89 | 0.59 |
| 0.48 | 0.89 | 0.57 |
| 0.48 | 0.88 | 0.57 |
| 0.49 | 0.87 | 0.57 |
| 0.49 | 0.87 | 0.55 |
| 0.50 | 0.87 | 0.54 |
| 0.51 | 0.86 | 0.54 |
| 0.51 | 0.86 | 0.52 |
| 0.52 | 0.86 | 0.51 |
| 0.52 | 0.86 | 0.49 |
| 0.52 | 0.85 | 0.49 |
| 0.53 | 0.85 | 0.48 |
| 0.54 | 0.84 | 0.48 |
| 0.54 | 0.83 | 0.48 |
| 0.54 | 0.83 | 0.46 |
| 0.55 | 0.82 | 0.46 |
| 0.55 | 0.81 | 0.46 |
| 0.55 | 0.81 | 0.45 |
| 0.55 | 0.81 | 0.45 |
| 0.55 | 0.81 | 0.43 |
| 0.56 | 0.80 | 0.43 |
| 0.57 | 0.79 | 0.43 |
| 0.57 | 0.79 | 0.42 |
| 0.57 | 0.78 | 0.42 |
| 0.58 | 0.78 | 0.40 |
| 0.58 | 0.77 | 0.40 |
| 0.58 | 0.76 | 0.40 |
| 0.58 | 0.76 | 0.39 |
| 0.58 | 0.75 | 0.39 |
| 0.58 | 0.75 | 0.37 |
| 0.58 | 0.74 | 0.37 |
| 0.59 | 0.74 | 0.35 |
| 0.59 | 0.74 | 0.35 |
| 0.59 | 0.74 | 0.34 |
| 0.60 | 0.73 | 0.34 |
| 0.60 | 0.73 | 0.32 |

|      |      |      |
|------|------|------|
| 0.60 | 0.72 | 0.32 |
| 0.61 | 0.71 | 0.32 |
| 0.61 | 0.70 | 0.32 |
| 0.61 | 0.69 | 0.32 |
| 0.62 | 0.68 | 0.32 |
| 0.63 | 0.67 | 0.32 |
| 0.63 | 0.66 | 0.32 |
| 0.64 | 0.66 | 0.32 |
| 0.65 | 0.65 | 0.32 |
| 0.65 | 0.64 | 0.32 |
| 0.66 | 0.64 | 0.31 |
| 0.66 | 0.63 | 0.31 |
| 0.67 | 0.62 | 0.31 |
| 0.67 | 0.61 | 0.31 |
| 0.67 | 0.61 | 0.29 |
| 0.67 | 0.61 | 0.28 |
| 0.67 | 0.60 | 0.28 |
| 0.68 | 0.59 | 0.28 |
| 0.68 | 0.59 | 0.26 |
| 0.69 | 0.58 | 0.26 |
| 0.69 | 0.58 | 0.25 |
| 0.69 | 0.58 | 0.25 |
| 0.69 | 0.57 | 0.25 |
| 0.70 | 0.56 | 0.25 |
| 0.70 | 0.56 | 0.23 |
| 0.70 | 0.55 | 0.23 |
| 0.71 | 0.54 | 0.23 |
| 0.71 | 0.53 | 0.23 |
| 0.71 | 0.52 | 0.23 |
| 0.71 | 0.52 | 0.22 |
| 0.71 | 0.52 | 0.20 |
| 0.72 | 0.51 | 0.20 |
| 0.72 | 0.51 | 0.19 |
| 0.73 | 0.50 | 0.19 |
| 0.73 | 0.50 | 0.19 |
| 0.73 | 0.49 | 0.19 |
| 0.74 | 0.49 | 0.17 |
| 0.74 | 0.48 | 0.17 |
| 0.74 | 0.47 | 0.17 |

|      |      |      |
|------|------|------|
| 0.75 | 0.47 | 0.15 |
| 0.76 | 0.47 | 0.14 |
| 0.76 | 0.46 | 0.14 |
| 0.77 | 0.45 | 0.14 |
| 0.78 | 0.44 | 0.14 |
| 0.78 | 0.43 | 0.14 |
| 0.78 | 0.43 | 0.14 |
| 0.78 | 0.43 | 0.12 |
| 0.78 | 0.42 | 0.12 |
| 0.78 | 0.41 | 0.12 |
| 0.78 | 0.41 | 0.11 |
| 0.79 | 0.41 | 0.09 |
| 0.79 | 0.40 | 0.09 |
| 0.79 | 0.40 | 0.08 |
| 0.80 | 0.40 | 0.06 |
| 0.80 | 0.39 | 0.06 |
| 0.80 | 0.38 | 0.06 |
| 0.81 | 0.37 | 0.06 |
| 0.81 | 0.36 | 0.06 |
| 0.81 | 0.35 | 0.06 |
| 0.81 | 0.35 | 0.06 |
| 0.81 | 0.34 | 0.06 |
| 0.81 | 0.34 | 0.05 |
| 0.82 | 0.33 | 0.05 |
| 0.82 | 0.32 | 0.05 |
| 0.82 | 0.31 | 0.05 |
| 0.82 | 0.30 | 0.05 |
| 0.82 | 0.29 | 0.05 |
| 0.83 | 0.28 | 0.05 |
| 0.83 | 0.27 | 0.05 |
| 0.84 | 0.27 | 0.05 |
| 0.84 | 0.26 | 0.05 |
| 0.84 | 0.25 | 0.05 |
| 0.85 | 0.25 | 0.03 |
| 0.85 | 0.24 | 0.03 |
| 0.85 | 0.24 | 0.02 |
| 0.85 | 0.23 | 0.02 |
| 0.86 | 0.22 | 0.02 |
| 0.86 | 0.21 | 0.02 |

|      |      |      |
|------|------|------|
| 0.87 | 0.20 | 0.02 |
| 0.87 | 0.20 | 0.02 |
| 0.87 | 0.19 | 0.02 |
| 0.87 | 0.18 | 0.02 |
| 0.87 | 0.17 | 0.02 |
| 0.87 | 0.16 | 0.02 |
| 0.88 | 0.15 | 0.02 |
| 0.88 | 0.14 | 0.02 |
| 0.88 | 0.13 | 0.02 |
| 0.89 | 0.12 | 0.02 |
| 0.90 | 0.12 | 0.02 |
| 0.91 | 0.11 | 0.02 |
| 0.92 | 0.10 | 0.02 |
| 0.93 | 0.09 | 0.02 |
| 0.93 | 0.08 | 0.02 |
| 0.93 | 0.07 | 0.02 |
| 0.94 | 0.06 | 0.02 |
| 0.94 | 0.05 | 0.02 |
| 0.94 | 0.05 | 0.00 |
| 0.95 | 0.04 | 0.00 |
| 0.95 | 0.04 | 0.00 |
| 0.95 | 0.03 | 0.00 |
| 0.95 | 0.02 | 0.00 |
| 0.96 | 0.01 | 0.00 |
| 1.00 | 0.00 | 0.00 |

**Supplementary Table 2A.** Illustrates cutoff points and corresponding sensitivities/specificities for the peripapillary retinal model.

| <b>Cutoff</b> | <b>Sensitivity</b> | <b>1 - Specificity</b> |
|---------------|--------------------|------------------------|
| 0.00          | 1.00               | 1.00                   |
| 0.33          | 1.00               | 0.98                   |
| 0.36          | 1.00               | 0.97                   |
| 0.39          | 1.00               | 0.95                   |
| 0.40          | 1.00               | 0.94                   |
| 0.40          | 0.99               | 0.94                   |

|      |      |      |
|------|------|------|
| 0.41 | 0.99 | 0.92 |
| 0.42 | 0.99 | 0.91 |
| 0.43 | 0.98 | 0.91 |
| 0.43 | 0.97 | 0.91 |
| 0.44 | 0.97 | 0.91 |
| 0.44 | 0.96 | 0.91 |
| 0.45 | 0.96 | 0.89 |
| 0.45 | 0.96 | 0.87 |
| 0.46 | 0.96 | 0.86 |
| 0.47 | 0.96 | 0.84 |
| 0.47 | 0.96 | 0.83 |
| 0.47 | 0.96 | 0.81 |
| 0.47 | 0.96 | 0.79 |
| 0.48 | 0.95 | 0.79 |
| 0.48 | 0.94 | 0.79 |
| 0.49 | 0.93 | 0.79 |
| 0.49 | 0.92 | 0.79 |
| 0.49 | 0.91 | 0.78 |
| 0.50 | 0.91 | 0.76 |
| 0.50 | 0.91 | 0.75 |
| 0.51 | 0.90 | 0.75 |
| 0.51 | 0.90 | 0.73 |
| 0.51 | 0.89 | 0.73 |
| 0.52 | 0.89 | 0.73 |
| 0.52 | 0.88 | 0.73 |
| 0.52 | 0.87 | 0.73 |
| 0.52 | 0.86 | 0.73 |
| 0.53 | 0.85 | 0.73 |
| 0.53 | 0.84 | 0.73 |
| 0.53 | 0.84 | 0.71 |
| 0.54 | 0.83 | 0.71 |
| 0.54 | 0.82 | 0.71 |
| 0.54 | 0.81 | 0.71 |
| 0.55 | 0.81 | 0.70 |
| 0.55 | 0.81 | 0.70 |
| 0.55 | 0.80 | 0.70 |
| 0.55 | 0.79 | 0.70 |
| 0.56 | 0.78 | 0.70 |
| 0.56 | 0.77 | 0.70 |

|      |      |      |
|------|------|------|
| 0.57 | 0.76 | 0.70 |
| 0.57 | 0.75 | 0.70 |
| 0.57 | 0.75 | 0.68 |
| 0.57 | 0.74 | 0.68 |
| 0.57 | 0.74 | 0.68 |
| 0.58 | 0.74 | 0.67 |
| 0.58 | 0.73 | 0.67 |
| 0.58 | 0.72 | 0.67 |
| 0.58 | 0.72 | 0.65 |
| 0.59 | 0.72 | 0.64 |
| 0.59 | 0.71 | 0.64 |
| 0.59 | 0.70 | 0.64 |
| 0.59 | 0.70 | 0.62 |
| 0.59 | 0.70 | 0.60 |
| 0.60 | 0.69 | 0.60 |
| 0.60 | 0.68 | 0.60 |
| 0.60 | 0.67 | 0.60 |
| 0.60 | 0.67 | 0.59 |
| 0.60 | 0.67 | 0.57 |
| 0.61 | 0.66 | 0.57 |
| 0.61 | 0.66 | 0.57 |
| 0.61 | 0.65 | 0.57 |
| 0.61 | 0.64 | 0.57 |
| 0.61 | 0.64 | 0.56 |
| 0.61 | 0.64 | 0.54 |
| 0.61 | 0.63 | 0.52 |
| 0.62 | 0.62 | 0.52 |
| 0.62 | 0.62 | 0.51 |
| 0.62 | 0.61 | 0.51 |
| 0.62 | 0.60 | 0.51 |
| 0.62 | 0.60 | 0.49 |
| 0.62 | 0.60 | 0.48 |
| 0.63 | 0.60 | 0.46 |
| 0.63 | 0.59 | 0.46 |
| 0.64 | 0.58 | 0.46 |
| 0.64 | 0.58 | 0.44 |
| 0.64 | 0.58 | 0.43 |
| 0.64 | 0.58 | 0.41 |
| 0.64 | 0.57 | 0.41 |

|      |      |      |
|------|------|------|
| 0.64 | 0.56 | 0.41 |
| 0.65 | 0.54 | 0.41 |
| 0.65 | 0.53 | 0.41 |
| 0.65 | 0.53 | 0.40 |
| 0.66 | 0.53 | 0.38 |
| 0.66 | 0.53 | 0.37 |
| 0.66 | 0.52 | 0.35 |
| 0.66 | 0.52 | 0.33 |
| 0.66 | 0.51 | 0.33 |
| 0.66 | 0.50 | 0.33 |
| 0.66 | 0.50 | 0.33 |
| 0.67 | 0.50 | 0.32 |
| 0.67 | 0.49 | 0.32 |
| 0.67 | 0.49 | 0.30 |
| 0.67 | 0.49 | 0.29 |
| 0.67 | 0.48 | 0.29 |
| 0.67 | 0.48 | 0.27 |
| 0.67 | 0.47 | 0.27 |
| 0.68 | 0.46 | 0.27 |
| 0.68 | 0.46 | 0.25 |
| 0.68 | 0.45 | 0.25 |
| 0.68 | 0.44 | 0.25 |
| 0.68 | 0.44 | 0.24 |
| 0.69 | 0.44 | 0.22 |
| 0.69 | 0.43 | 0.22 |
| 0.69 | 0.43 | 0.22 |
| 0.69 | 0.42 | 0.22 |
| 0.70 | 0.41 | 0.22 |
| 0.70 | 0.39 | 0.22 |
| 0.70 | 0.37 | 0.22 |
| 0.70 | 0.36 | 0.22 |
| 0.70 | 0.35 | 0.22 |
| 0.71 | 0.35 | 0.22 |
| 0.71 | 0.35 | 0.21 |
| 0.71 | 0.34 | 0.21 |
| 0.71 | 0.34 | 0.19 |
| 0.71 | 0.34 | 0.18 |
| 0.71 | 0.34 | 0.16 |
| 0.72 | 0.33 | 0.16 |



|      |      |      |
|------|------|------|
| 0.72 | 0.33 | 0.14 |
| 0.72 | 0.33 | 0.13 |
| 0.73 | 0.32 | 0.13 |
| 0.73 | 0.31 | 0.13 |
| 0.73 | 0.30 | 0.13 |
| 0.73 | 0.29 | 0.13 |
| 0.73 | 0.28 | 0.13 |
| 0.74 | 0.27 | 0.13 |
| 0.74 | 0.27 | 0.11 |
| 0.74 | 0.27 | 0.10 |
| 0.74 | 0.26 | 0.10 |
| 0.74 | 0.25 | 0.10 |
| 0.75 | 0.25 | 0.08 |
| 0.75 | 0.25 | 0.06 |
| 0.75 | 0.25 | 0.05 |
| 0.75 | 0.24 | 0.05 |
| 0.76 | 0.23 | 0.05 |
| 0.77 | 0.22 | 0.05 |
| 0.77 | 0.21 | 0.05 |
| 0.77 | 0.20 | 0.05 |
| 0.77 | 0.20 | 0.03 |
| 0.78 | 0.20 | 0.03 |
| 0.79 | 0.19 | 0.03 |
| 0.79 | 0.19 | 0.02 |
| 0.79 | 0.18 | 0.02 |
| 0.80 | 0.18 | 0.00 |
| 0.80 | 0.17 | 0.00 |
| 0.81 | 0.16 | 0.00 |
| 0.81 | 0.15 | 0.00 |
| 0.82 | 0.14 | 0.00 |
| 0.82 | 0.13 | 0.00 |
| 0.83 | 0.12 | 0.00 |
| 0.84 | 0.12 | 0.00 |
| 0.84 | 0.11 | 0.00 |
| 0.84 | 0.10 | 0.00 |
| 0.86 | 0.09 | 0.00 |
| 0.87 | 0.08 | 0.00 |
| 0.88 | 0.07 | 0.00 |
| 0.88 | 0.06 | 0.00 |

|      |      |      |
|------|------|------|
| 0.89 | 0.05 | 0.00 |
| 0.89 | 0.04 | 0.00 |
| 0.89 | 0.04 | 0.00 |
| 0.90 | 0.03 | 0.00 |
| 0.90 | 0.02 | 0.00 |
| 0.91 | 0.01 | 0.00 |
| 1.00 | 0.00 | 0.00 |

**Supplementary Table 2B.** Illustrates cutoff points and corresponding sensitivities/specificities for the macular model.

| <b>Cutoff</b> | <b>Sensitivity</b> | <b>1 - Specificity</b> |
|---------------|--------------------|------------------------|
| 0.00          | 1.00               | 1.00                   |
| 0.02          | 1.00               | 0.98                   |
| 0.06          | 1.00               | 0.97                   |
| 0.08          | 1.00               | 0.95                   |
| 0.09          | 1.00               | 0.94                   |
| 0.09          | 1.00               | 0.92                   |
| 0.11          | 1.00               | 0.90                   |
| 0.14          | 1.00               | 0.89                   |
| 0.16          | 1.00               | 0.87                   |
| 0.16          | 1.00               | 0.86                   |
| 0.17          | 1.00               | 0.84                   |
| 0.18          | 1.00               | 0.82                   |
| 0.20          | 0.99               | 0.82                   |
| 0.21          | 0.98               | 0.82                   |
| 0.21          | 0.98               | 0.81                   |
| 0.22          | 0.98               | 0.79                   |
| 0.23          | 0.98               | 0.77                   |
| 0.24          | 0.98               | 0.76                   |
| 0.25          | 0.97               | 0.76                   |
| 0.26          | 0.96               | 0.76                   |
| 0.28          | 0.96               | 0.76                   |
| 0.29          | 0.95               | 0.76                   |
| 0.29          | 0.94               | 0.76                   |
| 0.30          | 0.94               | 0.74                   |

|      |      |      |
|------|------|------|
| 0.30 | 0.94 | 0.73 |
| 0.32 | 0.94 | 0.71 |
| 0.34 | 0.94 | 0.69 |
| 0.35 | 0.94 | 0.68 |
| 0.35 | 0.94 | 0.66 |
| 0.37 | 0.94 | 0.65 |
| 0.38 | 0.94 | 0.63 |
| 0.38 | 0.94 | 0.61 |
| 0.39 | 0.94 | 0.60 |
| 0.40 | 0.94 | 0.58 |
| 0.40 | 0.94 | 0.57 |
| 0.42 | 0.94 | 0.55 |
| 0.43 | 0.94 | 0.53 |
| 0.44 | 0.94 | 0.52 |
| 0.45 | 0.94 | 0.50 |
| 0.45 | 0.94 | 0.48 |
| 0.46 | 0.94 | 0.47 |
| 0.47 | 0.94 | 0.45 |
| 0.47 | 0.94 | 0.44 |
| 0.47 | 0.93 | 0.44 |
| 0.48 | 0.93 | 0.42 |
| 0.48 | 0.92 | 0.42 |
| 0.48 | 0.91 | 0.42 |
| 0.49 | 0.91 | 0.40 |
| 0.49 | 0.91 | 0.39 |
| 0.50 | 0.90 | 0.39 |
| 0.50 | 0.90 | 0.37 |
| 0.50 | 0.89 | 0.37 |
| 0.51 | 0.88 | 0.37 |
| 0.51 | 0.88 | 0.36 |
| 0.51 | 0.88 | 0.36 |
| 0.52 | 0.87 | 0.36 |
| 0.53 | 0.86 | 0.36 |
| 0.55 | 0.86 | 0.34 |
| 0.56 | 0.85 | 0.34 |
| 0.56 | 0.84 | 0.34 |
| 0.57 | 0.83 | 0.34 |
| 0.57 | 0.83 | 0.32 |
| 0.57 | 0.82 | 0.32 |

|      |      |      |
|------|------|------|
| 0.58 | 0.81 | 0.32 |
| 0.58 | 0.81 | 0.31 |
| 0.58 | 0.80 | 0.31 |
| 0.58 | 0.80 | 0.31 |
| 0.59 | 0.80 | 0.29 |
| 0.59 | 0.79 | 0.29 |
| 0.61 | 0.78 | 0.29 |
| 0.62 | 0.78 | 0.27 |
| 0.63 | 0.77 | 0.27 |
| 0.63 | 0.77 | 0.26 |
| 0.64 | 0.76 | 0.26 |
| 0.64 | 0.75 | 0.26 |
| 0.65 | 0.75 | 0.24 |
| 0.65 | 0.75 | 0.23 |
| 0.65 | 0.74 | 0.23 |
| 0.65 | 0.73 | 0.23 |
| 0.66 | 0.72 | 0.23 |
| 0.67 | 0.71 | 0.23 |
| 0.67 | 0.71 | 0.23 |
| 0.68 | 0.70 | 0.23 |
| 0.68 | 0.69 | 0.23 |
| 0.68 | 0.68 | 0.23 |
| 0.69 | 0.67 | 0.23 |
| 0.69 | 0.67 | 0.21 |
| 0.69 | 0.66 | 0.21 |
| 0.69 | 0.66 | 0.19 |
| 0.70 | 0.65 | 0.19 |
| 0.71 | 0.64 | 0.19 |
| 0.71 | 0.64 | 0.18 |
| 0.71 | 0.63 | 0.18 |
| 0.71 | 0.63 | 0.18 |
| 0.72 | 0.62 | 0.18 |
| 0.72 | 0.61 | 0.18 |
| 0.72 | 0.60 | 0.18 |
| 0.73 | 0.59 | 0.18 |
| 0.73 | 0.58 | 0.18 |
| 0.74 | 0.57 | 0.18 |
| 0.74 | 0.56 | 0.18 |
| 0.74 | 0.55 | 0.18 |

|      |      |      |
|------|------|------|
| 0.74 | 0.55 | 0.18 |
| 0.75 | 0.54 | 0.18 |
| 0.75 | 0.53 | 0.18 |
| 0.75 | 0.52 | 0.18 |
| 0.76 | 0.51 | 0.18 |
| 0.77 | 0.50 | 0.18 |
| 0.77 | 0.49 | 0.18 |
| 0.77 | 0.49 | 0.16 |
| 0.78 | 0.48 | 0.16 |
| 0.79 | 0.47 | 0.16 |
| 0.80 | 0.47 | 0.15 |
| 0.80 | 0.47 | 0.13 |
| 0.81 | 0.47 | 0.11 |
| 0.81 | 0.46 | 0.11 |
| 0.81 | 0.46 | 0.11 |
| 0.82 | 0.45 | 0.11 |
| 0.82 | 0.44 | 0.11 |
| 0.82 | 0.43 | 0.11 |
| 0.82 | 0.42 | 0.11 |
| 0.82 | 0.41 | 0.11 |
| 0.83 | 0.40 | 0.11 |
| 0.83 | 0.39 | 0.11 |
| 0.84 | 0.38 | 0.11 |
| 0.84 | 0.38 | 0.11 |
| 0.85 | 0.37 | 0.11 |
| 0.86 | 0.36 | 0.11 |
| 0.86 | 0.35 | 0.11 |
| 0.86 | 0.35 | 0.10 |
| 0.87 | 0.35 | 0.08 |
| 0.87 | 0.35 | 0.07 |
| 0.87 | 0.34 | 0.07 |
| 0.88 | 0.33 | 0.07 |
| 0.89 | 0.33 | 0.05 |
| 0.89 | 0.32 | 0.05 |
| 0.89 | 0.31 | 0.05 |
| 0.90 | 0.30 | 0.05 |
| 0.90 | 0.30 | 0.05 |
| 0.91 | 0.30 | 0.03 |
| 0.91 | 0.29 | 0.03 |

|      |      |      |
|------|------|------|
| 0.91 | 0.29 | 0.02 |
| 0.91 | 0.28 | 0.02 |
| 0.91 | 0.27 | 0.02 |
| 0.91 | 0.26 | 0.02 |
| 0.91 | 0.25 | 0.02 |
| 0.91 | 0.24 | 0.02 |
| 0.92 | 0.23 | 0.02 |
| 0.92 | 0.22 | 0.02 |
| 0.92 | 0.21 | 0.02 |
| 0.92 | 0.21 | 0.02 |
| 0.92 | 0.20 | 0.02 |
| 0.92 | 0.20 | 0.00 |
| 0.93 | 0.19 | 0.00 |
| 0.93 | 0.18 | 0.00 |
| 0.93 | 0.17 | 0.00 |
| 0.93 | 0.16 | 0.00 |
| 0.93 | 0.15 | 0.00 |
| 0.94 | 0.14 | 0.00 |
| 0.94 | 0.13 | 0.00 |
| 0.94 | 0.13 | 0.00 |
| 0.95 | 0.12 | 0.00 |
| 0.95 | 0.11 | 0.00 |
| 0.95 | 0.10 | 0.00 |
| 0.95 | 0.09 | 0.00 |
| 0.95 | 0.08 | 0.00 |
| 0.96 | 0.07 | 0.00 |
| 0.96 | 0.06 | 0.00 |
| 0.96 | 0.05 | 0.00 |
| 0.97 | 0.05 | 0.00 |
| 0.97 | 0.04 | 0.00 |
| 0.97 | 0.03 | 0.00 |
| 0.98 | 0.02 | 0.00 |
| 0.99 | 0.01 | 0.00 |
| 1.00 | 0.00 | 0.00 |

**Supplementary Table 2C.** Illustrates cutoff points and corresponding sensitivities/specificities for the combined peripapillary and macular model.
